# Supplementary material for: Interneurons and oligodendrocyte progenitors form a structured synaptic network in the developing neocortex
Source: eLife journal article supplement (doi:10.7554/elife.06953), 2015-04-22
Supplement: supp [file elife-06953-supp-v1.zip]

# Synaptic coupling probabilities

Christophe Pouzat

*<2014-05-12 lun.>*

## 1 Introduction

We have the following data set distinguishing between two interneurons types: **FS** (fast spiking) and **NFS** (not fast spiking), and for each type the observed number of connection to a given post-synaptic cell type:

|               | FS | NFS | Total |
|---------------|----|-----|-------|
| Nb. (K)       | 35 | 112 | 147   |
| Connected (Y) | 15 | 23  | 48    |

We want to know if the difference between the observed connection probabilities:

- $\hat{p}_{\text{FS}} = 15/35 \approx 0.43$
- $\hat{p}_{\text{NFS}} = 23/112 \approx 0.21$

are "real" or could have arise by luck.

## 2 First approach

We model each of the two data sets (**FS** and **NFS**) as observations from two binomial distributions:

- $Y_{\text{FS}} \sim \mathcal{B}(K_{\text{FS}} = 35, p_{\text{FS}})$ ,
- $Y_{\text{NFS}} \sim \mathcal{B}(K_{\text{NFS}} = 112, p_{\text{NFS}})$ .

We would then have:

- $EY_{\text{T}} = K_{\text{T}} p_{\text{T}}$ ,
- $\text{Var}Y_{\text{T}} = K_{\text{T}} p_{\text{T}} (1 - p_{\text{T}})$ ,

where T takes one of the two, FS and NFS, values.

Our estimates  $\hat{p}_T = Y_T/K_T$  would then have the following expected values and variance:

- $E\hat{p}_T = p_T$ ,
- $\text{Var}\hat{p}_T = p_T(1 - p_T)/K_T \approx \hat{p}_T(1 - \hat{p}_T)/K_T$ .

It is tempting from this point to use the normal approximation to build (Wald) confidence intervals obtained by inverting a Wald test. But these confidence intervals aren't that good as show by Brown, Cai and DasGupta <sup>1</sup>. Among the better alternatives recommended in the latter publication we can use the *arcsine interval* based on the variance stabilization transformation of Anscombe <sup>2</sup>. The latter defines first the following proportion estimate:

$$\check{p}_T = \frac{Y_T + 3/8}{K_T + 3/4}.$$

A confidence interval of level  $\alpha$  is then obtained with:

$$\left[ \sin^2 \left( \arcsin \left( \sqrt{\check{p}} \right) - \frac{\kappa}{2\sqrt{K_T}} \right), \sin^2 \left( \arcsin \left( \sqrt{\check{p}} \right) + \frac{\kappa}{2\sqrt{K_T}} \right) \right],$$

where

$$\kappa = \Phi^{-1}(1 - \alpha/2)$$

and  $\Phi$  is the cumulative distribution function of the standard normal distribution (mean 0 and variance 1).

We are going to compute 90% confidence intervals for each of the two samples. The probability ( $\alpha$ ) for the true connection probability to be out of the interval will then be 0.1 (1-0.9). If we then assume that the two samples have **the same true connection probability** and if the two confidence intervals do not overlap, we can reject the null hypothesis (**same connection probability**) with a 0.99 (0.1 x 0.1) confidence level.

## 2.1 Using Python

We use `Python 3` even if the following commands should give the same results with `Python 2`. So we start the `Python` shell and import the necessary modules:

---

<sup>1</sup>Lawrence D. Brown, T. Tony Cai and Anirban DasGupta (2001) Interval Estimation for a Binomial Proportion. *Statistical Science* **16**: 101-133.

<sup>2</sup>F. J. Anscombe (1948) The Transformation of Poisson, Binomial and Negative-Binomial. *Biometrika* **35**: 246-254.

```
import numpy as np
from scipy.stats import binom
from scipy.stats import norm
```

We then define the required variables:

```
y_FS = 15
K_FS = 35
y_NFS = 23
K_NFS = 112
```

We get the  $\check{p}$ :

```
p_check_FS = (y_FS + 3./8.)/(K_FS + 3./4.)
p_check_NFS = (y_NFS + 3./8.)/(K_NFS + 3./4.)
```

We get  $\kappa$ :

```
kappa = norm.ppf(0.95)
```

The 90% confidence interval for  $\check{p}_{FS}$  is therefore:

```
CI_90_FS = (np.sin(np.arcsin(np.sqrt(p_check_FS)) - kappa/np.sqrt(K_FS)/2. )**2,
            np.sin(np.arcsin(np.sqrt(p_check_FS)) + kappa/np.sqrt(K_FS)/2. )**2)
CI_90_FS
```

```
0.2968728130643559  0.5686379957493932
```

And the 90% confidence interval for  $\check{p}_{NFS}$  is:

```
CI_90_NFS = (np.sin(np.arcsin(np.sqrt(p_check_NFS)) - kappa/np.sqrt(K_NFS)/2. )**2,
            np.sin(np.arcsin(np.sqrt(p_check_NFS)) + kappa/np.sqrt(K_NFS)/2. )**2)
CI_90_NFS
```

```
0.14809191938104865  0.27359824116324444
```

The two intervals **do not overlap** and we can reject the null with a 99% confidence.

### 3 Second approach

The recommend way to built the confidence intervals in Brown, Cai and DasGupta <sup>1</sup> is in fact the use of the *Wilson interval* defined by:

$$\left[ \frac{Y_T + \kappa^2/2}{K_T + \kappa^2} - \frac{\kappa \sqrt{K_T}}{K_T + \kappa^2} \sqrt{\hat{p}(1 - \hat{p}) + \frac{\kappa^2}{4K_T}}, \frac{Y_T + \kappa^2/2}{K_T + \kappa^2} + \frac{\kappa \sqrt{K_T}}{K_T + \kappa^2} \sqrt{\hat{p}(1 - \hat{p}) + \frac{\kappa^2}{4K_T}} \right] .$$

#### 3.1 Using Python

The 90% confidence interval for  $\check{p}_{FS}$  is therefore:

```
p_hat_FS = y_FS/K_FS
CI_Wilson_90_FS = ((y_FS+kappa**2/2)/(K_FS+kappa**2) -
                    kappa*np.sqrt(K_FS)/(K_FS+kappa**2)*np.sqrt(p_hat_FS*(1-p_hat_FS)+
                    kappa**2/K_FS/4.)),
                    (y_FS+kappa**2/2)/(K_FS+kappa**2) +
                    kappa*np.sqrt(K_FS)/(K_FS+kappa**2)*np.sqrt(p_hat_FS*(1-p_hat_FS)+
                    kappa**2/K_FS/4.))
CI_Wilson_90_FS
0.30103625941541223  0.5663572445109468
```

And the 90% confidence interval for  $\check{p}_{NFS}$  is:

```
p_hat_NFS = y_NFS/K_NFS
CI_Wilson_90_NFS = ((y_NFS+kappa**2/2)/(K_NFS+kappa**2) -
                    kappa*np.sqrt(K_NFS)/(K_NFS+kappa**2)*
                    np.sqrt(p_hat_NFS*(1-p_hat_NFS)+
                    kappa**2/K_NFS/4.)),
                    (y_NFS+kappa**2/2)/(K_NFS+kappa**2) +
                    kappa*np.sqrt(K_NFS)/(K_NFS+kappa**2)*
                    np.sqrt(p_hat_NFS*(1-p_hat_NFS)+
                    kappa**2/K_NFS/4.))
CI_Wilson_90_NFS
0.14987821338072027  0.27473547125420866
```

Again, no overlap.

## 4 Third approach

We consider the difference  $\hat{p}_{\text{FS}} - \hat{p}_{\text{NFS}}$  and we estimate the cumulative distribution of this difference under the null hypothesis:  $p_{\text{FS}} = p_{\text{NFS}} = p$ . The estimate  $\hat{p}$  of  $p$  is then:

$$\hat{p} = \frac{Y_{\text{FS}} + Y_{\text{NFS}}}{K_{\text{FS}} + K_{\text{NFS}}} \approx 0.26$$

We then simulate 10000 samples with  $35 + 112$  events each of them having the same probability  $\hat{p}$  of being connected. For each simulated sample  $(n)$  we compute the difference  $\hat{p}_{\text{FS}}^{(n)} - \hat{p}_{\text{NFS}}^{(n)}$ . We then get the cumulative distribution function of these 10000 differences and we look at the probability of obtaining (under the null hypothesis) a difference equal to or larger than the one we actually observed.

### 4.1 Using Python

First in order to get reproducible simulations, we explicitly seed our (pseudo)random number generator:

```
np.random.seed(20061001)
```

We then do our simulations very simply with:

```
n_replicates = 10000
p_hat = (y_FS+y_NFS)/(K_FS+K_NFS)
res = binom.rvs(K_FS,p_hat,size=n_replicates)/K_FS-
      binom.rvs(K_NFS,p_hat,size=n_replicates)/K_NFS
```

The probability of obtaining a difference equal to or larger than the one we observed is then:

```
p_diff_obs=y_FS/K_FS-y_NFS/K_NFS
np.sum(res >= p_diff_obs)/n_replicates

0.0062
```

Again smaller than 0.01...

With `python 2`, one should use:

```
p_diff_obs=float(y_FS/K_FS-y_NFS/K_NFS)

to compute p_diff_obs.
```
