# Supplementary figures and images for: Interneurons and oligodendrocyte progenitors form a structured synaptic network in the developing neocortex
Source: eLife journal article supplement (doi:10.7554/elife.06953), 2015-04-22

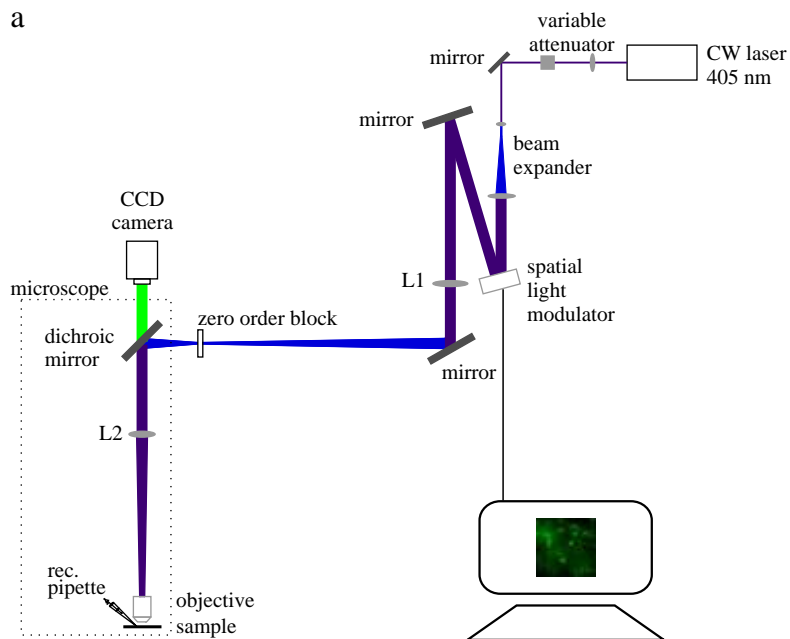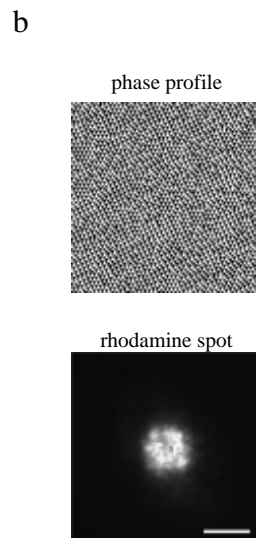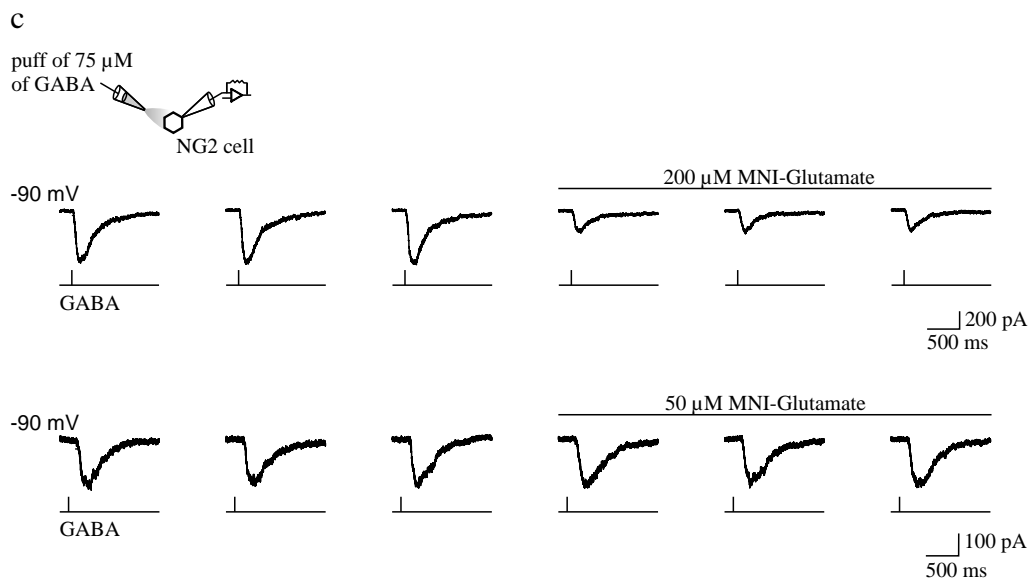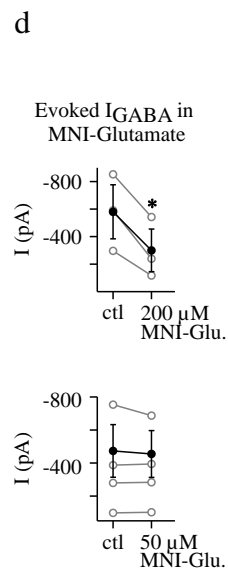

Supplement: supp [file elife-06953-supp-v1.zip]

a

## ALL INTERNEURON TESTED

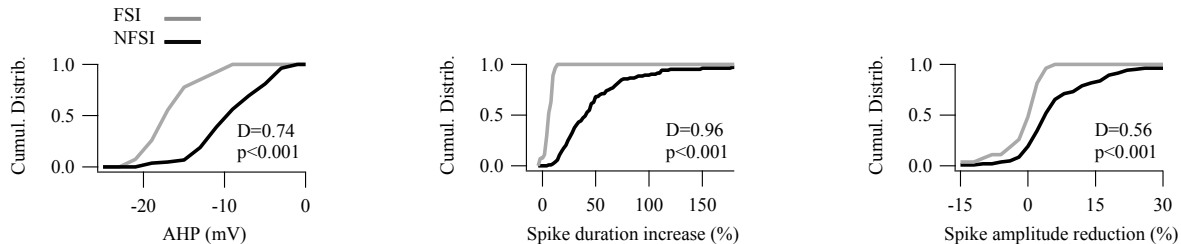

b

## ONLY CONNECTED INTERNEURONS TO NG2 CELLS

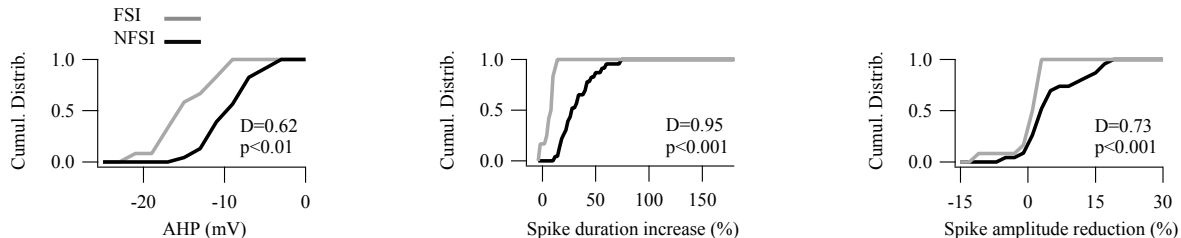

Supplement: supp [file elife-06953-supp-v1.zip]

a

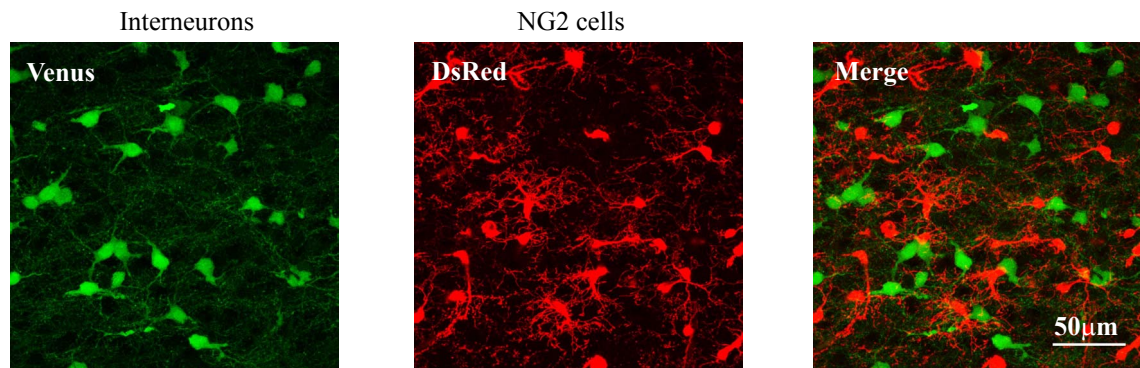

b

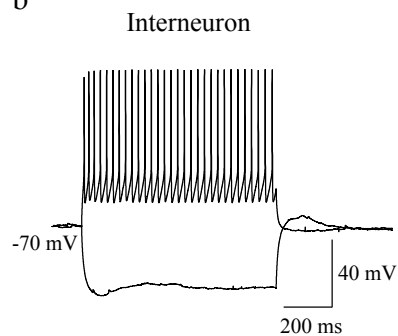

c

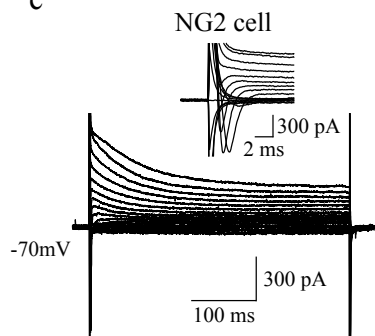

d

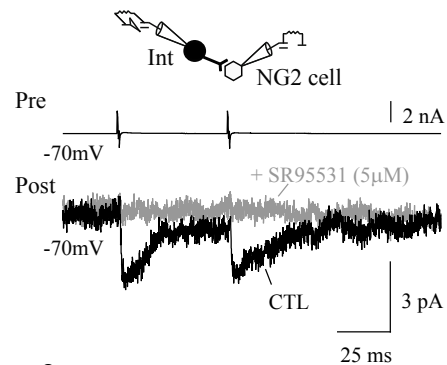

e

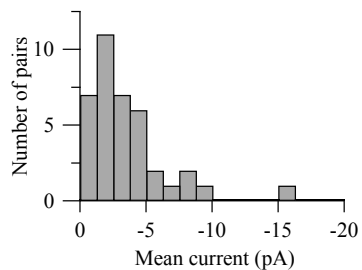

f

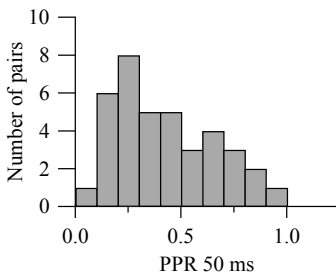

g

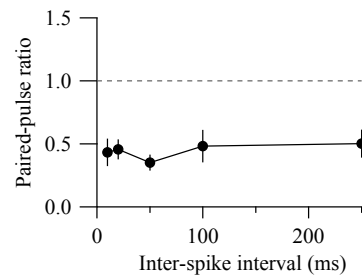

Supplement: supp [file elife-06953-supp-v1.zip]

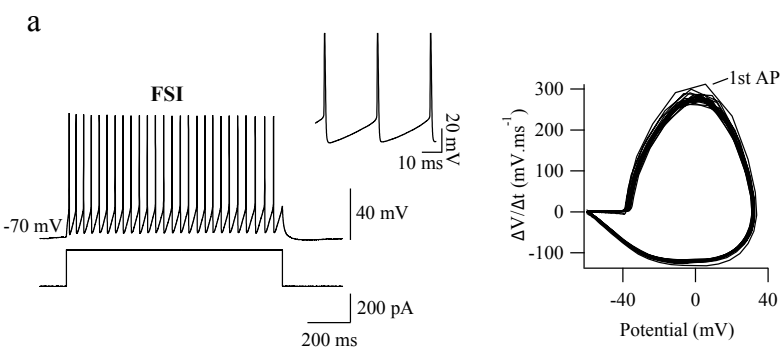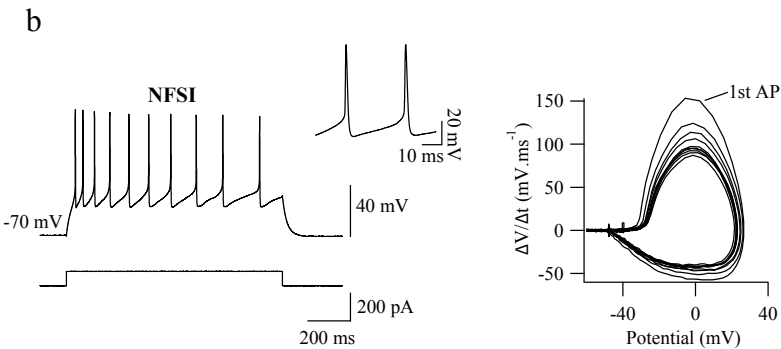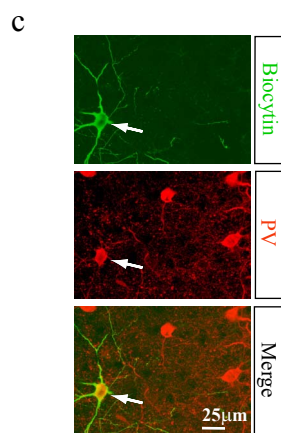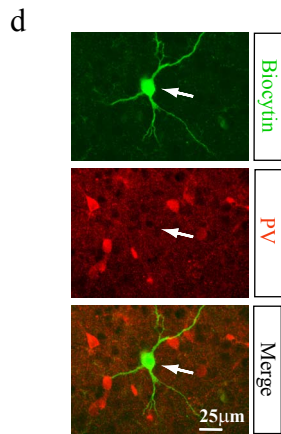

Supplement: supp [file elife-06953-supp-v1.zip]

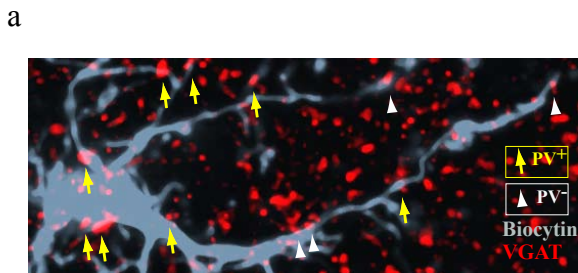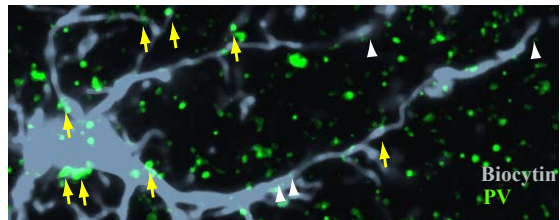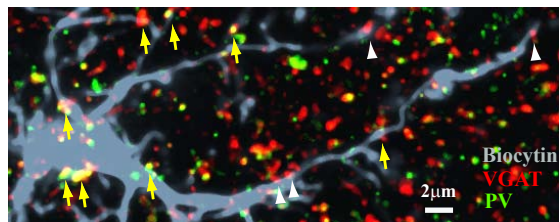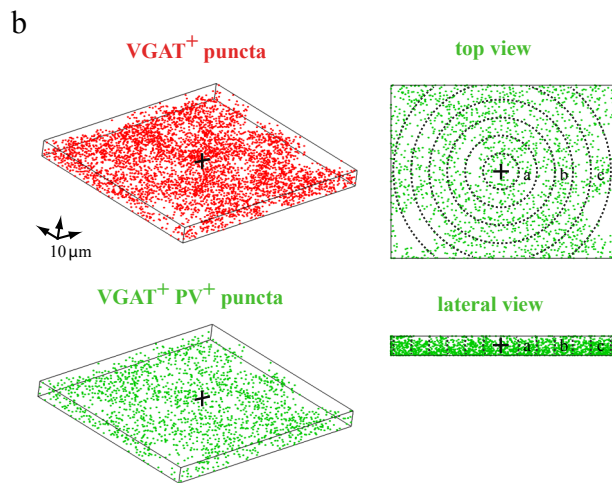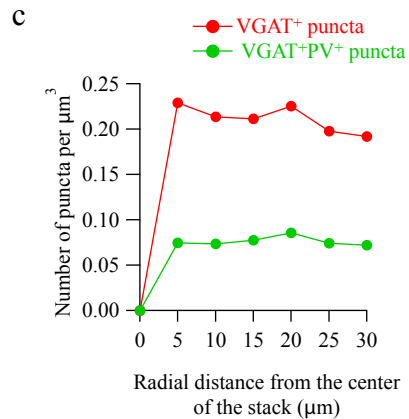

Supplement: supp [file elife-06953-supp-v1.zip]

## FSI vs. NFSI

a

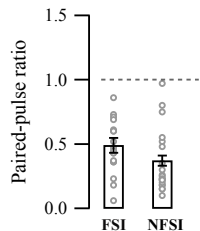

b

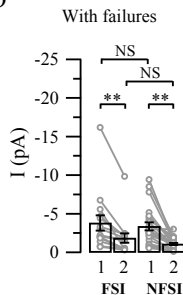

c

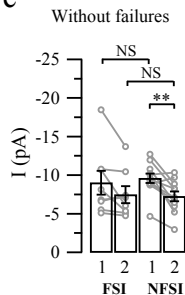

d

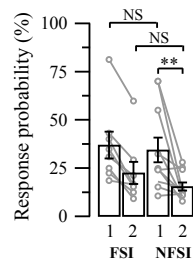

e

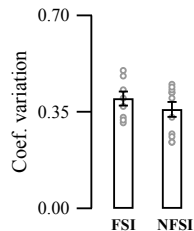

## Single vs. Double site

f

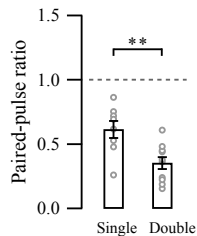

g

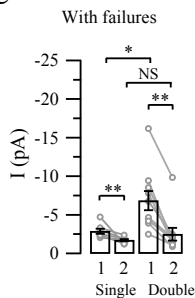

h

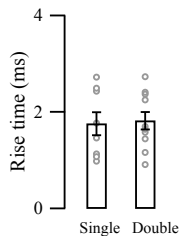

i

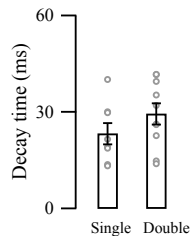

j

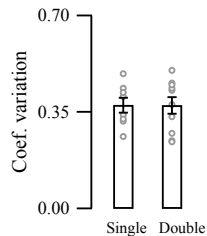

Supplement: supp [file elife-06953-supp-v1.zip]

**a**

PN8

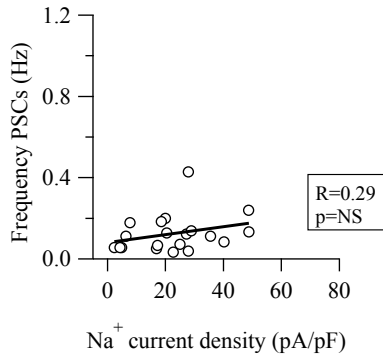**b**

PN10

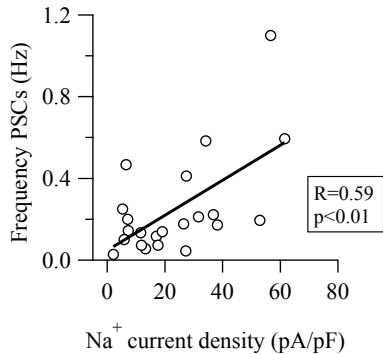**c**

PN13

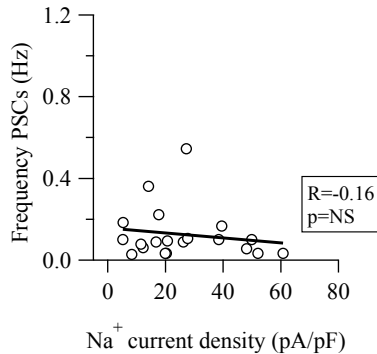

Supplement: supp [file elife-06953-supp-v1.zip]

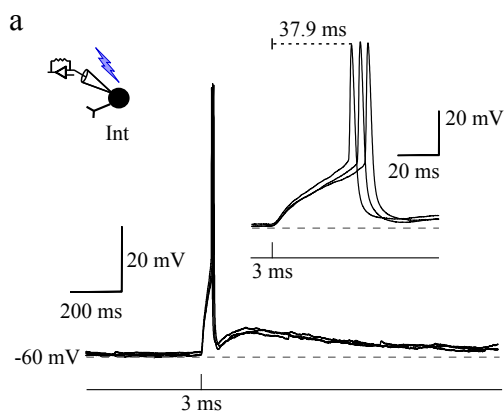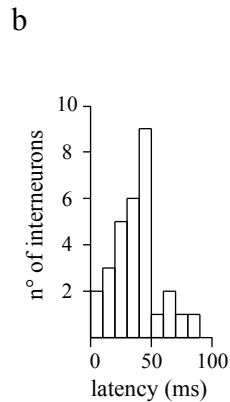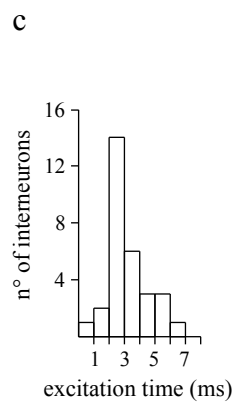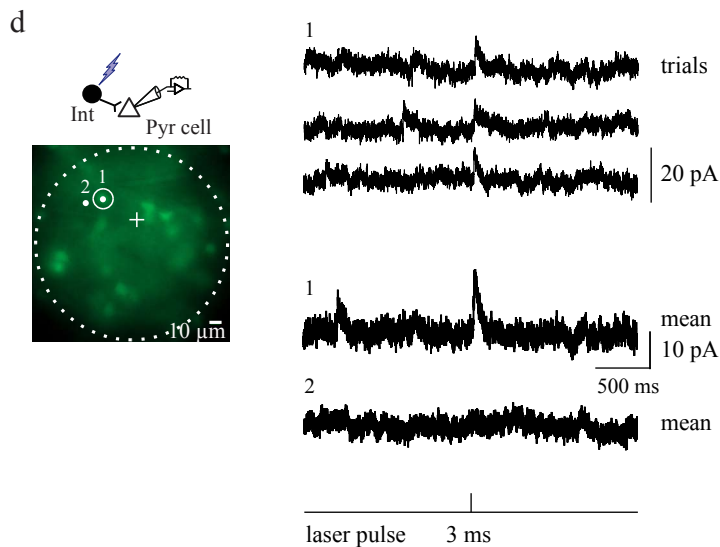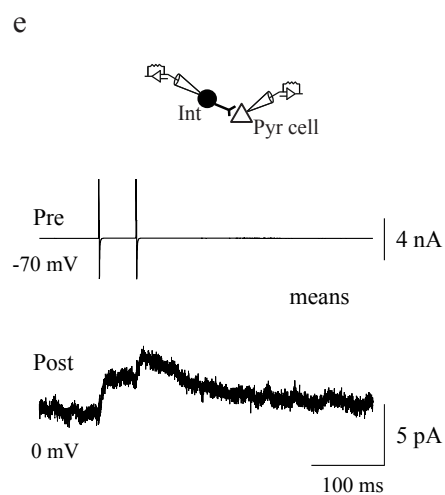

Supplement: supp [file elife-06953-supp-v1.zip]

a

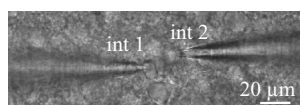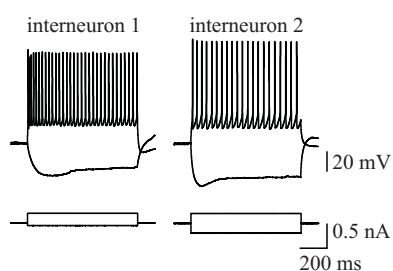

b

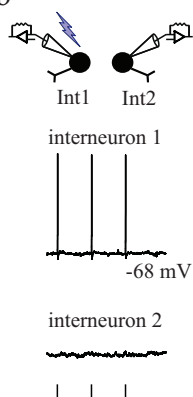

c

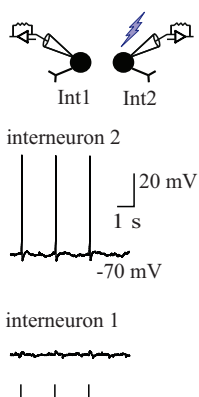

d

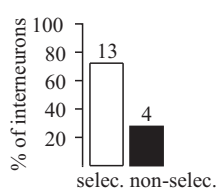

Supplement: supp [file elife-06953-supp-v1.zip]
